# Supplementary material
Source: PubMed Central journal article supplement (PMC8862677)

**Table S1: Laboratory data of hospitalized heart transplant recipients with COVID-19 during follow-up (n=33)**

| <b>HOSPITALIZED PATIENTS ONLY (n=33)</b>                     |                 |
|--------------------------------------------------------------|-----------------|
| <b>Laboratory data (during hospitalization/worst result)</b> |                 |
| Lymphocytes count (per mm <sup>3</sup> )                     | 376(186-601)    |
| D-dimer (ng/mL)                                              | 2146(684-5837)  |
| Urea (mg/dL)                                                 | 101(59-233)     |
| Creatinine (mg/dL)                                           | 2.00(1.63-3.43) |
| High sensitivity C-reactive protein (mg/dL)                  | 123(72-194)     |

Continuous values are presented as median (interquartile range) and categorical ones as n and percentages.

**Table S2: Clinical and laboratory data and outcomes according to the severity of the disease (n=40) and laboratory data at admission and during hospitalization for hospitalized patients (n=33)**

| Variables                                          | Mild disease<br>(Score < 5)<br>(n=23) | Severe disease<br>(Score ≥ 5)<br>(n=17) | p      |
|----------------------------------------------------|---------------------------------------|-----------------------------------------|--------|
| Male gender n(%)                                   | 14(60.9)                              | 10(58.8)                                | 0.896  |
| Age n(%)                                           | 53(45-58)                             | 54(33-61)                               | 0.945  |
| White n(%)                                         | 20(87)                                | 12(70.6)                                | 0.201  |
| <b>Etiology</b>                                    |                                       |                                         | 0.834  |
| Ischemic n(%)                                      | 1(4.3)                                | 1(5.9)                                  |        |
| Chagas n(%)                                        | 9(39.1)                               | 7(41.2)                                 |        |
| Idiopathic n(%)                                    | 1(4.3)                                | 0                                       |        |
| Other n(%)                                         | 12(52.2)                              | 9(52.9)                                 |        |
| Hypertension n(%)                                  | 9(39.1)                               | 5(29.4)                                 | 0.524  |
| Diabetes n(%)                                      | 7(30.4)                               | 3(17.6)                                 | 0.356  |
| Obesity n(%)                                       | 0(0)                                  | 2(11.8)                                 | 0.091  |
| Chronic Obstructive Pulmonary Disease n(%)         | 0(0)                                  | 2(11.8)                                 | 0.091  |
| Chronic renal failure n(%)                         | 6(26.1)                               | 9(52.9)                                 | 0.083  |
| <b>Signs or Symptoms</b>                           |                                       |                                         |        |
| Fever n(%)                                         | 10(43.5)                              | 8(47.1)                                 | 0.822  |
| Respiratory n(%)                                   | 14(60.9)                              | 12(70.6)                                | 0.524  |
| Dyspnea n(%)                                       | 5(21.7)                               | 11(64.7)                                | 0.006  |
| Anosmia n(%)                                       | 2(8.7)                                | 0                                       | 0.212  |
| Dysgeusia n(%)                                     | 5(21.7)                               | 1(5.9)                                  | 0.165  |
| Gastrointestinal n(%)                              | 8(34.8)                               | 3(17.6)                                 | 0.230  |
| Thrombosis at admission n(%)                       | 1(4.3)                                | 1(5.9)                                  | 0.826  |
| <b>Immunosuppressive therapy</b>                   |                                       |                                         |        |
| Tacrolimus n(%)                                    | 14(60.9)                              | 10(58.8)                                | 0.896  |
| Cyclosporine n(%)                                  | 8(34.8)                               | 7(41.2)                                 | 0.680  |
| Sodium Mycophenolate n(%)                          | 20(87)                                | 13(76.5)                                | 0.388  |
| Azathioprine n(%)                                  | 2(8.7)                                | 2(11.8)                                 | 0.749  |
| Sirolimus n(%)                                     | 1(4.3)                                | 0                                       | 0.384  |
| Steroids n(%)                                      | 20(87)                                | 15(88.2)                                | 0.904  |
| Left ventricular dysfunction at admission n(%)     | 1(4.8)                                | 4(23.5)                                 | 0.089  |
| Left ventricular ejection fraction (%)             | 60(60-64)                             | 60(52-64)                               | 0.383  |
| Systolic blood pressure (mmHg)                     | 127(116-132)                          | 118(105-130)                            | 0.196  |
| Diastolic blood pressure (mmHg)                    | 80(74-90)                             | 77(68-81)                               | 0.151  |
| Heart Rate (bpm)                                   | 97(90-106)                            | 94(84-100)                              | 0.331  |
| <b>Laboratory data (admission), [median (IQR)]</b> |                                       |                                         |        |
| Leucocytes count (per mm <sup>3</sup> )            | 5400(4100-6320)                       | 6270(5235-8650)                         | 0.098  |
| Lymphocytes count (per mm <sup>3</sup> )           | 796(608-1394)                         | 707(366-882)                            | 0.116  |
| D-dimer (ng/mL)                                    | 555(371-2093)                         | 612(1327-2114)                          | 0.439  |
| Urea (mg/dL)                                       | 56(39-72)                             | 72(60-121)                              | 0.013  |
| Creatinine (mg/dL)                                 | 1.4(1.1-1.9)                          | 2.0(1.6-2.5)                            | 0.002  |
| High sensitivity C-reactive protein (mg/L)         | 42(11-78)                             | 67(44-118)                              | 0.136  |
| <b>Medication during COVID-19</b>                  |                                       |                                         |        |
| Immunosuppressive therapy withdrawn n(%)           | 15(65.2)                              | 16(94.1)                                | 0.030  |
| Intravenous steroid n(%)                           | 11(47.8)                              | 16(94.1)                                | 0.002  |
| Antibiotics use n(%)                               | 18(78.3)                              | 14(82.4)                                | 0.749  |
| Hydroxychloroquine n(%)                            | 1(4.3)                                | 0(0)                                    | 0.384  |
| Tocilizumab n(%)                                   | 0(0)                                  | 0(0)                                    |        |
| Therapeutic Anticoagulation n(%)                   | 4(17.4)                               | 7(41.2)                                 | 0.096  |
| Prophylactic Anticoagulation n(%)                  | 9(39.1)                               | 7(41.2)                                 | 0.896  |
| <b>Vasoactive drug use</b>                         |                                       |                                         |        |
| Inotrope n(%)                                      | 0(0)                                  | 5(29.4)                                 | 0.005  |
| Vasopressor n(%)                                   | 0(0)                                  | 13(76.5)                                | <0.001 |
| Mechanical circulatory support n(%)                | 0(0)                                  | 3(17.6)                                 | 0.036  |
| Intraaortic balloon pump n(%)                      | 0(0)                                  | 3(17.6)                                 | 0.036  |
| ECMO n(%)                                          | 0(0)                                  | 0(0)                                    |        |
| <b>Outcomes</b>                                    |                                       |                                         |        |
| Intensive care unit hospitalization n(%)           | 3(13)                                 | 14(82.4)                                | <0.001 |

|                                                                              |                                                   |                                                  |          |
|------------------------------------------------------------------------------|---------------------------------------------------|--------------------------------------------------|----------|
| Mechanical ventilation n(%)                                                  | 0(0)                                              | 9(52.9)                                          | <0.001   |
| Hemodynamic instability (shock) n(%)                                         | 0                                                 | 11(64.7)                                         | <0.001   |
| Thrombosis n(%)                                                              | 1(4.3)                                            | 4(23.5)                                          | 0.070    |
| Acute rejection n(%)                                                         | 1(4.3)                                            | 3(17.6)                                          | 0.166    |
| 30-day mortality n(%)                                                        | 0(0)                                              | 5(29.4)                                          | 0.005    |
| Overall mortality n(%)                                                       | 0(0)                                              | 11(64.7)                                         | <0.001   |
| <b>HOSPITALIZED PATIENTS only (n=33)</b>                                     | <b>Mild disease<br/>(Score &lt; 5)<br/>(n=16)</b> | <b>Severe disease<br/>(Score ≥ 5)<br/>(n=17)</b> | <b>p</b> |
| Time of hospitalization [median (IQR)], days                                 | 9(5-14)                                           | 35(16-50)                                        | <0.001   |
| <b>Laboratory data (at admission) [median (IQR)]</b>                         |                                                   |                                                  |          |
| Lymphocytes count (per mm <sup>3</sup> )                                     | 721(589-1088)                                     | 707(366-882)                                     | 0.465    |
| D-dimer (ng/mL)                                                              | 858(496-2720)                                     | 1328(612-2114)                                   | 1.0      |
| Urea (mg/dL)                                                                 | 60(40-81)                                         | 72(60-121)                                       | 0.094    |
| Creatinine (mg/dL)                                                           | 1.50(1.09-1.94)                                   | 2.02(1.63-2.53)                                  | 0.011    |
| High sensitivity C-reactive protein (mg/L)                                   | 69(18-111)                                        | 68(45-119)                                       | 0.581    |
| <b>Laboratory data (during hospitalization - worse level) [median (IQR)]</b> |                                                   |                                                  |          |
| Lymphocytes count (per mm <sup>3</sup> )                                     | 570(387-920)                                      | 191(107-375)                                     | <0.001   |
| D-dimer (ng/mL)                                                              | 1394(578-4126)                                    | 3336(1982-12903)                                 | 0.074    |
| Urea (mg/dL)                                                                 | 63(48-95)                                         | 233(103-295)                                     | <0.001   |
| Creatinine (mg/dL)                                                           | 1.73(1.18-2.08)                                   | 3.29(2.00-4.03)                                  | <0.001   |
| High sensitivity C-reactive protein (mg/L)                                   | 78(38-144)                                        | 130(105-229)                                     | 0.041    |
| Ferritin (ng/mL).                                                            | 517(266-1070)                                     | 1055(429-1860)                                   | 0.170    |

**Figure S1:** Kaplan Meier overall survival rate curves after COVID-19 for all HT recipient's cohort (panel A) and also according to illness severity (panel B).

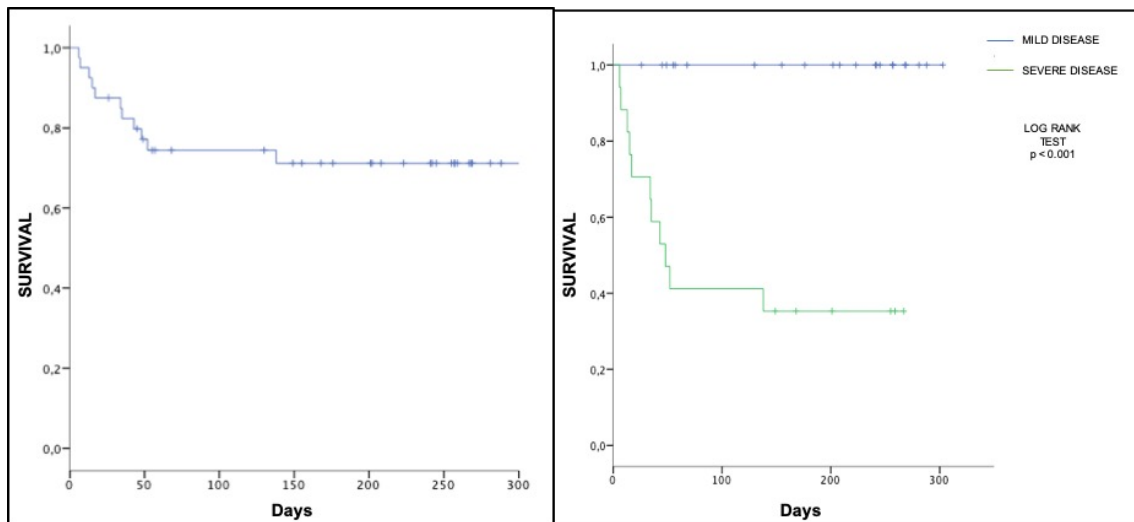

Supplement: tp-106-0641-s001.pdf [file tp-106-0641-s001.pdf]
